# Supplementary material
Source: PubMed Central journal article supplement (PMC3177283)
Supplement: supp_pp.111.173922_173922Figure_S1.pdf [file supp_pp.111.173922_173922Figure_S1.pdf]

# FIGURE S1

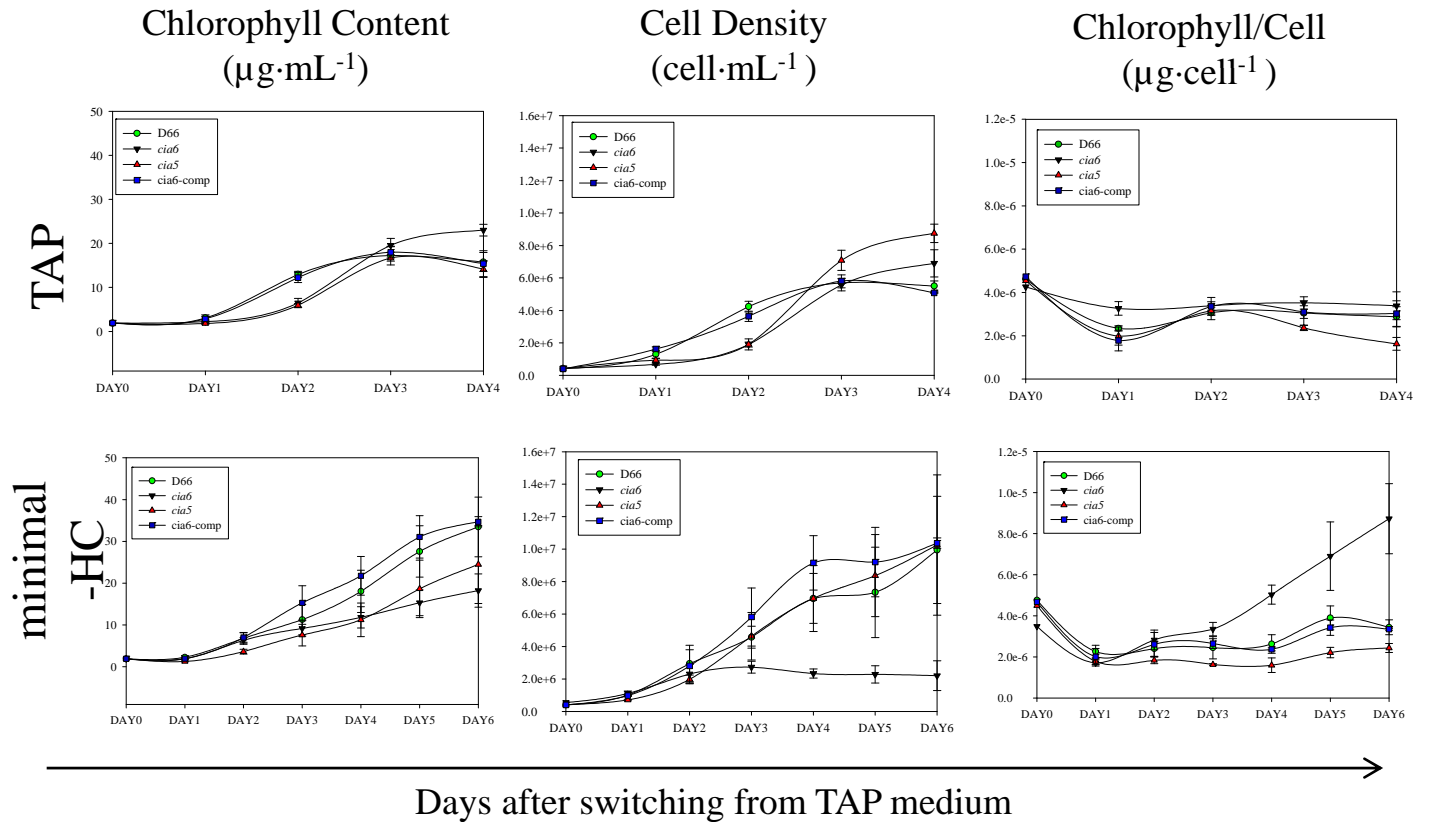

**Figure S1.** A higher chlorophyll content per cell was observed in the mutant *cia6*. Cultures of D66 (●), *cia6* (▼), *cia5* (▲) and *cia6-comp* (■) were initially started in TAP medium, and then switched to minimal or TAP medium at the same chlorophyll concentration of  $1.9 \mu\text{g}\cdot\text{mL}^{-1}$  till the stationary phase is reached. Samples were collected every 24 hours and chlorophyll concentration and cell density were measured, and the chlorophyll concentration per cell were calculated. Each point represents the mean and standard error of three separate experiments.
